# Supplementary material
Source: bioRxiv or medRxiv preprint supplement (https://www.biorxiv.org/highwire/filestream/6027/field_highwire_adjunct_files/5/022889-2.pdf)
Supplement: Supplementary file [file 022889-2.pdf]

**Additional File 2 General information about the 24 metapopulations analyzed.**

| Group              | Population       | Sample_Size | Dataset |
|--------------------|------------------|-------------|---------|
| South Africa(37)   | Pedi             | 9           | 5       |
|                    | Nguni            | 9           | 5       |
|                    | Sotho/Tswana     | 7           | 5       |
|                    | !Kung            | 12          | 5       |
| East Africa(46)    | Luhya            | 22          | 5       |
|                    | Alur             | 10          | 5       |
|                    | Hema             | 14          | 5       |
| West Africa(160)   | Yoruba           | 111         | 4       |
|                    | Dogon            | 24          | 6       |
|                    | Bambara          | 25          | 6       |
| Europe(166)        | CEU              | 111         | 4       |
|                    | Tuscan           | 25          | 5       |
|                    | French           | 5           | 1       |
|                    | Slovenian        | 25          | 6       |
| Caucasus(42)       | Urkarah          | 18          | 5       |
|                    | Kurd             | 24          | 5       |
| West Asia(38)      | Pakistani        | 23          | 6       |
|                    | Balochi          | 2           | 1       |
|                    | Makrani          | 4           | 1       |
|                    | Sindhi           | 4           | 1       |
|                    | Pathan           | 5           | 1       |
| Central Asia(23)   | Kyrgyzstani      | 23          | 6       |
| North India(25)    | Bhil             | 7           | 3       |
|                    | Meghawal         | 5           | 3       |
|                    | Sahariya         | 4           | 3       |
|                    | Satnami          | 4           | 3       |
|                    | Lodi             | 5           | 3       |
| South India(98)    | Dravidian        | 11          | 2       |
|                    | Chenchu          | 6           | 3       |
|                    | Kurumba          | 9           | 3       |
|                    | Hallaki          | 6           | 3       |
|                    | Kamsali          | 3           | 3       |
|                    | Madiga           | 4           | 3       |
|                    | Mala             | 3           | 3       |
|                    | T.N. Dalit       | 13          | 5       |
|                    | Irula            | 22          | 5       |
|                    | A.P. Mala        | 11          | 5       |
| A.P. Madiga        | 10               | 5           |         |
| East Asia(188)     | Japan            | 86          | 4       |
|                    | Han Chinese      | 88          | 4       |
|                    | Miaozu           | 5           | 1       |
|                    | Tujia            | 5           | 1       |
|                    | Yizu             | 4           | 1       |
| South Asia(35)     | Khmer            | 5           | 5       |
|                    | Thai             | 20          | 6       |
|                    | Cambodian        | 3           | 1       |
|                    | Vietnamese       | 7           | 5       |
| Malaysia(10)       | Temuan           | 10          | 4       |
| Borneo(73)         | Land Dayak       | 15          | 2       |
|                    | Barito River     | 23          | 4       |
|                    | Bidayuh          | 10          | 4       |
|                    | Iban             | 25          | 5       |
| Sumatra(20)        | Besemah          | 10          | 2       |
|                    | Semedé           | 10          | 2       |
| East indonesia(10) | Flores           | 1           | 2       |
|                    | Roti             | 4           | 2       |
|                    | Timor            | 3           | 2       |
|                    | Alor             | 2           | 2       |
| Philippine(16)     | Manobo           | 16          | 2       |
| Moluccas(10)       | Hiri             | 7           | 4       |
|                    | Ternate          | 3           | 4       |
| Australian(10)     |                  | 10          | 2       |
| New Guinea(27)     | Papua New Guinea | 24          | 2       |
|                    | Papuan           | 3           | 1       |
| Fiji(24)           |                  | 24          | 4       |
| Polinesia(44)      | Polynesia        | 19          | 4       |
|                    | Samoan           | 13          | 6       |
|                    | Tongan           | 12          | 6       |
| Onge(9)            | Negrito          | 9           | 4       |
| Jehai(8)           | Negrito          | 8           | 4       |
| Mamanwa(11)        | Negrito          | 11          | 2       |
